# Supplementary material for: Coffee consumption and risk of breast cancer: A Mendelian randomization study
Source: PLoS One. 2021 Jan 19;16(1):e0236904. doi: 10.1371/journal.pone.0236904 (PMC7815134; doi:10.1371/journal.pone.0236904)
Supplement: S3 Table — (XLSX) [file pone.0236904.s009.xlsx]

## Sheet: Sheet1
S3 Table. SNPs associated with secondary traits using Phenoscanner (http://www.phenoscanner.medschl.cam.ac.uk/upload/)
SNP	Chr	Source	Associated traits	p-value
rs4357572	1	UKBB	Body mass index	4.6e-08
rs539515	1	UKBB	Age at menarche	3.32e-20
		UKBB	Body mass index	6.64e-58
			Body mass index	1.37e-28
			Body mass index females	3.1e-21
rs62106258	2		Age at menarche	7.38e-23
		UKBB	Body mass index	3.93e-59
rs13387939	2	UKBB	Age at menarche	1.7e-19
		UKBB	Body mass index	1.07e-57
			Body mass index	5.58e-16
			Body mass index males	1.95e-09
			Body mass index females	2.12e-08
rs1260326	2	UKBB	Alcohol intake frequency	7.6e-40
			Alcohol consumption in current drinkers	7e-24
			Alcohol consumption	1e-21
		UKBB	Alcohol intake versus 10 years previously	4.75e-11
			Nonalcoholic fatty liver disease	1e-09
			Age at menopause	1e-09
rs2236955	3	UKBB	Age at menarche	6.4e-09
rs55754437	4
rs2199936	4
rs34190000	5
rs1422191	5		Body mass index	5e-19
			Body mass index	1.3e-08
rs2763981	6
rs2465054	6	UKBB	Body mass index	2.21e-07
rs78707595	7
rs4410790	7		Body mass index	3.7e-07
			Body mass index	4.4e-07
rs12699854	7
rs73075157	7
rs34060476	7	UKBB	Alcohol intake frequency	5.39e-08
rs1057868	7
rs395815	8
rs61928609	12
rs16966903	15
rs2472297	15		Body mass index	9e-08
rs117968677	15
rs2667773	15
rs2521501	15
rs17817964	16	UKBB	Age at menarche	2.32e-35
			Age at menarche	7.8e-16
		UKBB	Alcohol intake frequency	9.91e-09
		UKBB	Body mass index in physically active indivdiuals	0
			Body mass index in physically active indivdiuals	0
			Body mass index ajusted for physical activity in females	0
			Body mass index adjsuted for physical activity in males	0
rs8056750	16
rs7224815	17
rs62064918	17
rs4092465	18
rs66723169	18		Alcohol intake frequency	1.03e-09
		UKBB	Body mass index	1.98e-71
			Body mass index	2.96e-24
			Body mass index males	5.13e-14
			Body mass index females	5.07e-13
rs56113850	19	UKBB	Current tobacco smoking	1.37e-17
		UKBB	Smoking status: current	5.27e-15
		UKBB	Pack years adult smoking as proportion of life span exposed to smoking	9.32e-11
		UKBB	Pack years of smoking preview only	4.68e-10
		UKBB	Smoking status: previous	3.69e-08
rs3810291	19	UKBB	Age at menarche	2.74e-09
			Age at menarche	5.7e-07
		UKBB	Body mass index	6.54e-31
			Body mass index	6.8e-24
rs6063085	20
rs6062357	20
rs17004922	22
